# Supplementary material
Source: PubMed Central journal article supplement (PMC3186356)
Supplement: supp_M111.274571_Supplementaries.pdf [file supp_M111.274571_Supplementaries.pdf]

## SUPPLEMENTAL DATA

for

### Engineering the respiratory complex I to an energy-converting NADPH:ubiquinone oxidoreductase

by

Klaudia Morina, Marius T. Schulte, Florian Hubrich, Katerina Dörner, Stefan Steimle, Stefan Stolpe and Thorsten Friedrich

#### Supplementary Tables:

**Table S1:** Primers for site directed mutagenesis.

**Table S2:** Primers for the insertion of the *nptI-sacRB* cartridge and for amplification of the PCR fragment carrying the point mutation.

**Table S3:** Preparation of the variant Glu183Asp<sup>F</sup>.

**Table S4:** Preparation of the variant Glu183Gln<sup>F</sup>.

**Table S5:** Preparation of the variant Glu183Asn<sup>F</sup>.

**Table S6:** Preparation of the variant Glu183His<sup>F</sup>.

#### Supplementary Figures:

**Figure S1: Sequence alignment of NuoF (numbering according to the *E. coli* subunit) around the nucleotide binding site.** The position of Glu183 is marked in red.

**Figure S2: SDS-Gel of the preparations of complex I from the parental strain (A) and the Glu183His<sup>F</sup> variant (C).** Lane (B) shows the pattern of the marker (PageRuler Protein unstained Ladder, Fermentas). The molecular mass of the marker proteins is indicated. The SDS-Gel of the other preparations looked virtually identical to the ones shown in this figure.

**Figure S3: Detection of superoxide formation.** The spectrum was recorded with the Glu183Asp<sup>F</sup> variant reconstituted in phospholipids in the presence of 100 mM DEPMPO, 100  $\mu$ M decyl-ubiquinone, and 1 mM NADPH. EPR conditions were: microwave frequency: 9.65 GHz; modulation amplitude: 0.1 mT; time constant: 0.164 s; scan rate: 5.4 mT/min.

**Table S1:** Primers for site directed mutagenesis. The mutations introduced are marked in bold. The new restriction site for *VspI* is underlined.

| <b>Primer</b>         | <b>Sequence</b>                                               |
|-----------------------|---------------------------------------------------------------|
| <i>nuoF</i> E183D_fwd | 5'-CTGCGGGGAAG <b>AT</b> ACAGC <u>CATTAAT</u> CAACTCCCTGG-3'  |
| <i>nuoF</i> E183D_rev | 5'-CCAGGGAGTTG <u>GATTAAT</u> GCTGT <b>AT</b> CTTCCCCGCAG -3' |
| <i>nuoF</i> E183H_fwd | 5'-CTGCGGGGAAC <b>AC</b> ACAGC <u>CATTAAT</u> CAACTCCCTGG-3'  |
| <i>nuoF</i> E183H_rev | 5'-CCAGGGAGTTG <u>GATTAAT</u> GCTGT <b>GT</b> GTTCCCCGCAG -3' |
| <i>nuoF</i> E183Q_fwd | 5'-CTGCGGGGAAC <b>AG</b> ACAGC <u>CATTAAT</u> CAACTCCCTGG-3'  |
| <i>nuoF</i> E183Q_rev | 5'-CCAGGGAGTTG <u>GATTAAT</u> GCTGT <b>CT</b> GTTCCCCGCAG -3' |
| <i>nuoF</i> E183N_fwd | 5'-CTGCGGGGAAA <b>AC</b> ACAGC <u>CATTAAT</u> CAACTCCCTGG-3'  |
| <i>nuoF</i> E183N_rev | 5'-CCAGGGAGTTG <u>GATTAAT</u> GCTGT <b>GTTT</b> CCCCGCAG -3'  |

**Table S2:** Primers for the insertion of the *nptI-sacRB* cartridge and for amplification of the PCR fragment carrying the point mutation. Regions homologous to *nuoF* are underlined. Regions homologous to the *nptI-sacRB* cartridge are marked bold.

| <b>Primer</b>                | <b>Sequence</b>                                                                                  |
|------------------------------|--------------------------------------------------------------------------------------------------|
| <i>nuoF::nptI-sacRB</i> _fwd | 5'- <u>CCGCTGACCTGGCGTCTGCGCGATGACAAACAGCCAGTG</u><br><u>TGGCTGGACGGTACCGGATCCGTCGACCTG</u> -3'  |
| <i>nuoF::nptI-sacRB</i> _rev | 5'- <u>GCCAGGCTTTAAATTT</u> CAGACCATCACGCATACCACCGGC<br><u>GTAATCTTCGGAATTCCCCGGGGGATCCG</u> -3' |
| <i>nuoF2</i> _fwd            | 5'-AACATTATCCGTACTCCCGAAACG-3'                                                                   |
| <i>nuoF</i> _rev             | 5'-CAGATCAAGGTGCGCTTC-3'                                                                         |

**Table S3:** Isolation of the complex I variant Glu183Asp<sup>F</sup> from 25 g cells (wet weight).

| preparation                   | NADH/ferricyanide-oxidoreductase activity |                 |                                                  |                                                                        |              |
|-------------------------------|-------------------------------------------|-----------------|--------------------------------------------------|------------------------------------------------------------------------|--------------|
|                               | volume<br>[mL]                            | protein<br>[mg] | total<br>[ $\mu\text{mol}\cdot\text{min}^{-1}$ ] | specific<br>[ $\mu\text{mol}\cdot\text{min}^{-1}\cdot\text{mg}^{-1}$ ] | yield<br>[%] |
| membranes                     | 17.8                                      | 1337            | 4146                                             | 3.1                                                                    | 100          |
| extract                       | 59.5                                      | 1021            | 3469                                             | 3.4                                                                    | 82           |
| Fractogel EMD                 | 70                                        | 154             | 2961                                             | 19.2                                                                   | 71           |
| ProBond Ni <sup>2+</sup> -IDA | 1                                         | 2.4             | 185                                              | 77                                                                     | 4            |

**Table S4:** Isolation of the complex I variant Glu183Gln<sup>F</sup> from 22 g cells (wet weight).

| preparation                   | NADH/ferricyanide-oxidoreductase activity |                 |                                                  |                                                                        |              |
|-------------------------------|-------------------------------------------|-----------------|--------------------------------------------------|------------------------------------------------------------------------|--------------|
|                               | volume<br>[mL]                            | protein<br>[mg] | total<br>[ $\mu\text{mol}\cdot\text{min}^{-1}$ ] | specific<br>[ $\mu\text{mol}\cdot\text{min}^{-1}\cdot\text{mg}^{-1}$ ] | yield<br>[%] |
| membranes                     | 10,1                                      | 714             | 3414                                             | 4.8                                                                    | 100          |
| extract                       | 60                                        | 409             | 3150                                             | 7.7                                                                    | 92           |
| Fractogel EMD                 | 35                                        | 322             | 3115                                             | 9.7                                                                    | 91           |
| ProBond Ni <sup>2+</sup> -IDA | 0.3                                       | 2.9             | 237                                              | 81                                                                     | 7            |

**Table S5:** Isolation of the complex I variant Glu183Asn<sup>F</sup> from 17 g cells (wet weight).

| preparation                   | NADH/ferricyanide-oxidoreductase activity |                 |                                                  |                                                                        |              |
|-------------------------------|-------------------------------------------|-----------------|--------------------------------------------------|------------------------------------------------------------------------|--------------|
|                               | volume<br>[mL]                            | protein<br>[mg] | total<br>[ $\mu\text{mol}\cdot\text{min}^{-1}$ ] | specific<br>[ $\mu\text{mol}\cdot\text{min}^{-1}\cdot\text{mg}^{-1}$ ] | yield<br>[%] |
| membranes                     | 6                                         | 398             | 2430                                             | 5.4                                                                    | 100          |
| extract                       | 31                                        | 548             | 1717                                             | 3.1                                                                    | 71           |
| Fractogel EMD                 | 2.5                                       | 121             | 1433                                             | 11.8                                                                   | 59           |
| ProBond Ni <sup>2+</sup> -IDA | 0.3                                       | 2.0             | 120                                              | 60                                                                     | 5            |

**Table S6:** Isolation of the complex I variant Glu183His<sup>F</sup> from 20 g cells (wet weight).

| preparation                   | NADH/ferricyanide-oxidoreductase activity |                 |                                                  |                                                                        |              |
|-------------------------------|-------------------------------------------|-----------------|--------------------------------------------------|------------------------------------------------------------------------|--------------|
|                               | volume<br>[mL]                            | protein<br>[mg] | total<br>[ $\mu\text{mol}\cdot\text{min}^{-1}$ ] | specific<br>[ $\mu\text{mol}\cdot\text{min}^{-1}\cdot\text{mg}^{-1}$ ] | yield<br>[%] |
| membranes                     | 8,2                                       | 613             | 1542                                             | 2.5                                                                    | 100          |
| extract                       | 30                                        | 454             | 1269                                             | 2.8                                                                    | 82           |
| Fractogel EMD                 | 21                                        | 153             | 1163                                             | 7.6                                                                    | 75           |
| ProBond Ni <sup>2+</sup> -IDA | 0.5                                       | 4.4             | 342                                              | 78                                                                     | 22           |

|                         |             |                |                |              |                 |             |               |
|-------------------------|-------------|----------------|----------------|--------------|-----------------|-------------|---------------|
|                         |             | 63             | 73             | 80           | 90              | 100         | 110           |
| <i>E. coli</i>          | VKDAGLKGRG  | GAGFSTGLKW     | SLMPKD---E     | SMNIRYLLCN   | ADEMPEGTYK      | DRLLMEQLPH  |               |
| <i>T. thermophilus</i>  | VKRSGLRGRG  | GAGFPTGLKW     | SFMPKD---D     | GK-QHYLICN   | ADESEPGSFK      | DRYILEDVPH  |               |
| <i>A. aeolicus</i>      | VDKSTLRGRG  | GAGFPTGKKW     | KF&VQN---P     | GP--RYFICN   | ADESEPGTFK      | DRIIERDPH   |               |
| <i>P. denitrificans</i> | MKASGLRGRG  | GAGFPTGMKW     | SFMPKE---S     | DGRPSYLVIN   | ADESEPATCK      | DREIMRHDPH  |               |
| <i>N. crassa</i>        | VKASGLRGRG  | GAGFPSGLKW     | SFMNFKDWDK     | DDKPRYLVVN   | ADEGEPGTC       | DREIMRKDPH  |               |
| <i>Y. lipolytica</i>    | IKKSGLRGRG  | GAGFPSGLKW     | SFMNPPGWEK     | NEGPRYLVVN   | ADEGEPGTC       | DREIMRKDPH  |               |
| <i>B. taurus</i>        | VKTSGLRGRG  | GAGFPTGLKW     | SFMNKP---S     | DGRPKYLVVN   | ADEGEPGTC       | DREIIRHDPH  |               |
| <i>H. sapiens</i>       | IKTSGLRGRG  | GAGFPTGLKW     | SFMNKP---S     | DGRPKYLVVN   | ADEGEPGTC       | DREILRHDPH  |               |
|                         | :-          | : * : **       | ****-: * ** -: | -            | * : : * *** **- | * ** :-     | **            |
|                         |             | 120            | 130            | 140          | 150             | 160         | 170           |
| <i>E. coli</i>          | LLVEGMLISA  | FALKAYRGI      | FLRGEYIEAA     | VMLRRAIAEA   | TEAGLLGKNI      | MGTGDFDFELF |               |
| <i>T. thermophilus</i>  | LLIEGMILAG  | YAIRATVGI      | YVRGEYRRAA     | DRLEQAIKEA   | RARGYLGNL       | FGTDFSFDLH  |               |
| <i>A. aeolicus</i>      | LLIEGIIISS  | YAIGANEAYI     | YIRGEYPAGY     | YILRDAIEEA   | KKKGFGLKNI      | LGSGFDLEIY  |               |
| <i>P. denitrificans</i> | TLIEGALIAS  | FAMGAHAAYI     | YIRGEFIRER     | EALQAAIDEC   | YDAGLLGRNA      | AGSGWDFDLY  |               |
| <i>N. crassa</i>        | KLVEGCLVAG  | RAMNATAAYI     | YIRGEFIQEA     | AILQNAINEA   | YADGLIGKNA      | CGSGYDFDVY  |               |
| <i>Y. lipolytica</i>    | KLVEGCLLAG  | RAMNATAAYI     | YIRGEFYNEA     | AVLQTAINEA   | YAAGLIGKDA      | CGSGYDFDVY  |               |
| <i>B. taurus</i>        | KLVEGCLVGG  | RAMGARAAYI     | YIRGEFYNEA     | SNLQVAIREA   | YEAGLIGKNA      | CGSGYDFDVF  |               |
| <i>H. sapiens</i>       | KLLEGCLVGG  | RAMGARAAYI     | YIRGEFYNEA     | SNLQVAIREA   | YEAGLIGKNA      | CGSGYDFDVF  |               |
|                         | * : ** :-   | * : *          | - **           | : : ** :     | * - ** *        | * : * : :   | * : - : - : - |
|                         |             | 180            | 190            | 200          | 210             | 220         | 230           |
| <i>E. coli</i>          | VHTGAGRYIC  | GEETALINSL     | EGRANPRSK      | PPFPATSGAW   | GKPTCVNVE       | TLCNVPAILA  |               |
| <i>T. thermophilus</i>  | VHRGAGAYIC  | GEETALMNSL     | EGLRANPRLK     | PPFPAQSGLW   | GKPTTINVE       | TLASVVPIME  |               |
| <i>A. aeolicus</i>      | VARGAGAYIC  | GEETALIESL     | EKKRGHPRLK     | PPYPVQKGLW   | GKPTVVMNVE      | TIANVFFIIS  |               |
| <i>P. denitrificans</i> | LHHGAGAYIC  | GEETALLESL     | EKKKGMPRMK     | PPFPAGAGLY   | GCPTTVNVE       | SI&VVP&TILR |               |
| <i>N. crassa</i>        | LHRGAGAYVC  | GEETSLIESL     | EKGPKPRLK      | PPFPA&VGLF   | GCPST&NVE       | TV&V&PTICR  |               |
| <i>Y. lipolytica</i>    | IHRMG&YVC   | GEETSLIESL     | EKG&GK&PRLK    | PPFP&G&VGLF  | GRPST&NVE       | TV&V&PTILR  |               |
| <i>B. taurus</i>        | VVRGAGAYIC  | GEETALIESI     | EKGQ&GK&PRLK   | PPFP&D&V&GVF | GCPTT&NVE       | TV&V&SPTICR |               |
| <i>H. sapiens</i>       | VVRGAGAYIC  | GEETALIESI     | EKGQ&GK&PRLK   | PPFP&D&V&GVF | GCPTT&NVE       | TV&V&SPTICR |               |
|                         | : * * * : * | **** : * : * : | ** - ** *      | ** : * - *   | * : * * : * :   | *** :-      | *             |

Fig. S1; Morina *et al.*

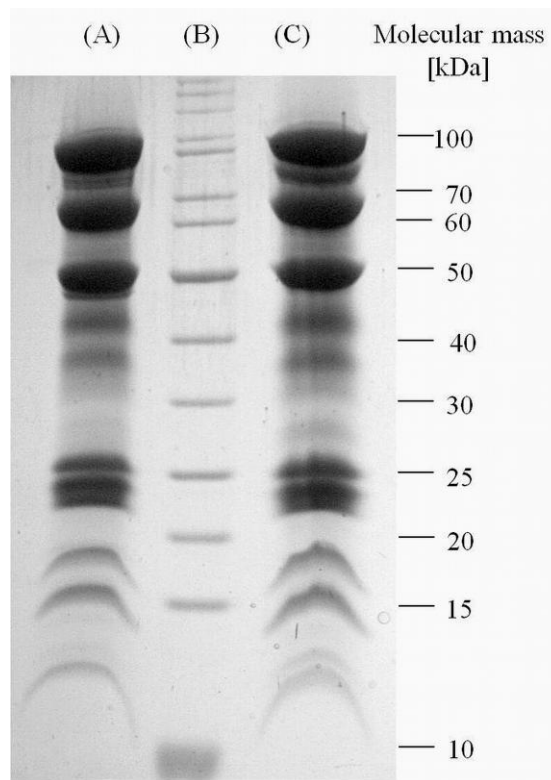

Fig. S2; Morina *et al.*

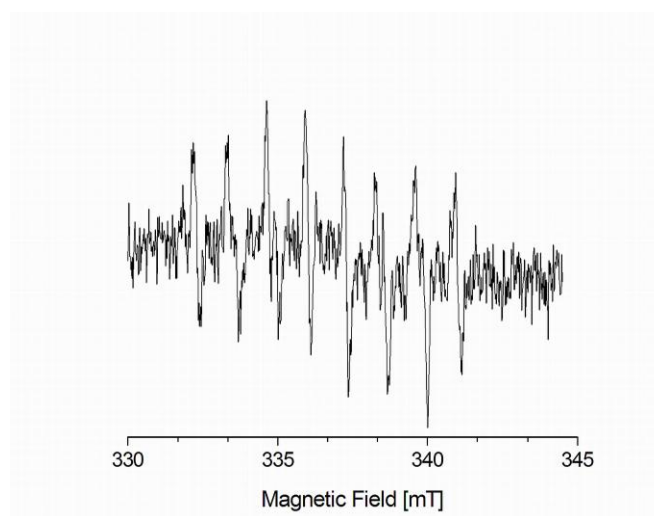

Fig. S3; Morina *et al.*
